# Supplementary material for: Linking Altered Flow Regimes to Biological Condition: an Example Using Benthic Macroinvertebrates in Small Streams of the Chesapeake Bay Watershed
Source: Environ Manage. 2021 Mar 12;67(6):1171–85. doi: 10.1007/s00267-021-01450-5 (PMC8106597; doi:10.1007/s00267-021-01450-5)
Supplement: Supplementary file 2 — Supplementary Material TableS1 [file 267_2021_1450_MOESM2_ESM.xlsx]

## Sheet: Table S1
Table S1. Summary statistics and description for predictors used in the HM (n =1,235) and Chessie BIBI (training n = 3,391) models and for all reaches in the Chesapeake Bay watershed (n = 82,234). Predictor values from Wieczorek et al. (2018), Bioregion was also included in the Chessie BIBI logistic regression models but is not included in the table. Min. = minimum, Max = maximum, PRISM = Paramet…
				Gage data set					Entire Cheasapeake Bay watershed					BIBI Training data set
Category	Variable	Description		Mean	Median	Min	Max		Mean	Median	Min	Max		Mean	Median	Min	Max
Natural Driver	Drainage area	Total upstream drainage area, in square kilometers		2253	447.1	5	49802.3		656.8	5.8	0	71229.8		33.6168	15.5196	0.2268	199.732
	Elevation	Mean watershed elevation (meters) from 30m NHDPlus.		------	------	------	------		------	------	------	------		344.444	349.375	0.82	1224.8
	Precipitation	Mean annual precipitation (mm) of watershed, derived from 1971-2000 PRISM data.		------	------	------	------		------	------	------	------		109.716	110.7	84	154.2
	Temperature	Mean annual air temperature (degrees C) of watershed, derived from 1971-2000 PRISM data.		------	------	------	------		------	------	------	------		10.4887	10.67	6.24	15.16
	BFI	Base Flow Index (BFI), The BFI is a ratio of base flow to total streamflow, expressed as a percentage and ranging from 0 to 100. Base flow is the sustained, slowly varying component of streamflow, usually attributed to ground-water discharge to a stream.		------	------	------	------		------	------	------	------		45.3259	44.24	24.12	66.05
	TOPWET	Topographic wetness index, ln(a/S); where "ln" is the natural log, "a" is the upslope area per unit contour length and "S" is the slope at that point. See http://ks.water.usgs.gov/Kansas/pubs/reports/wrir.99-4242.html and Wolock and McCabe, 1995 for more detail		------	------	------	------		------	------	------	------		11.542	11.345	7.68	18.56
	Depth to water table	Estimated mean depth to water table in meters		------	------	------	------		------	------	------	------		-25.5613	-22.585	-121.76	-1.24
	Clay soils	Average value of clay content in soils (percentage)		------	------	------	------		------	------	------	------		21.6801	19.45	8.14	57.85
	KFACT	Average K-factor value for the uppermost soil horizon in each soil component. K-factor is an erodibility factor which quantifies the susceptibility of soil particles to detachment and movement by water. The K-factor is used in the Universal Soil Loss Equation (USLE) to estimate soil loss by water. Higher values of K-factor indicate greater potential for erosion		------	------	------	------		------	------	------	------		0.259646	0.25	0.16	0.43
	Calcium Oxide lithology	Mean watershed percent Calcium Oxide concentration of lithology (percent).		------	------	------	------		------	------	------	------		6.2374	2.69	0	38.52
	UCS	Mean watershed Rock Uniaxial Compressive Strength, megaPascals.		------	------	------	------		------	------	------	------		79.0335	77.52	0.52	223.84
Anthropogenic Stressor	Flow alteration intensity	Sum of the number of hydrologic metrics with an inflated or diminshed category		------	------	------	------		------	------	------	------		2.15259	0	0	12
	Freshwater withdrawals	Total freshwater withdrawal from basin, in megaliters per year per sqkm, from 1995-2000 county-level estimates		27.9	7.6	0.1	714		25.5	3	0	3295.6		28.9051	3.26	0.12	758.9
	Density NPDES	Density of NPDES "major" point locations in basin; number per 100 km sq. Major locations are defined by an EPA-assigned major flag. From download of NPDES national database summer 2006.		0.2	0	0	8.7		0.1	0	0	218.3		0.0900708	0	0	62.77
	N application	Estimate of nitrogen from fertilizer and manure, from Census of Ag 1997, based on county-wide sales and percent agricultural land cover in basin, kg/sq km		1682.1	1232.7	0.1	17312.1		2242	1478.5	0	22600.9		2203.83	1330.62	0	20195.6
	Dam storage	Dam storage in basin, in megaliters total storage per sq km		158657	2704.8	0	9.05468e+06		14880.6	0	0	1.94267e+06		274.149	0	0	60483
	Canal/ditch/pipeline	Percent of NHD segments in basin that are categorized as "canal" or "ditch" or "pipeline"		0.6	0	0	59.4		0.4	0	0	100		0.189757	0	0	100
	Pesticide application	Estimate of agricultural pesticide application (219 types), kg/sq km, from Census of Ag 1997, based on county-wide sales and percent agricultural land cover in basin		34.1	10.1	0	1373.7		42.6	14	0	4310.1		41.7708	11.665	0	1944.82
	Tiles	Percent of basin area influenced by tile drains, as of 1992		1.3	0.3	0	21.7		0.8	0.2	0	40.4		0.531907	0.1268	0	20.0169
	Open water	NLCD 2011 "open water" category, percent of upstream catchment		1.11109	0.55	0	20.23		2.36853	0.18	0	100		0.327753	0.06	0	42.07
	Barren land	NLCD 2011 "barren land" category, percent of upstream catchment		0.343271	0.15	0	15.45		0.275716	0	0	100		0.264763	0.02	0	17.62
	Shrub/scrub	NLCD 2011 "shrub/scrub" category, percent of upstream catchment		1.90127	0.94	0	22.04		1.43053	0.51	0	69.42		1.36196	0.52	0	27.46
	Grassland/herbaceuos	NLCD 2011 "grassland/herbaceous" category, percent of upstream catchment		2.0412	1.2	0	17.43		1.51489	0.41	0	100		1.31055	0.46	0	37.32
	Urban	NLCD 2011 "total development", sum of NLCD 21, 22, 23, and 24 categories, percent of upstream catchment		14.8365	7.22	0	99.83		10.8585	5.47	0	100.01		10.9315	5.245	0	98.74
	Agriculture	NLCD 2011 "total agriculture", sum of NLCD 81 and 82 categories, percent of upstream catchment		15.7835	12.7	0	87.29		22.0078	16.28	0	100		21.586	15.525	0	91.25
	Wetland	NLCD 2011 "total wetlands", sum of NLCD 90 and 95 categories, percent of upstream catchment		5.9764	2.5	0	53.01		5.96415	0.87	0	100		3.2871	0.49	0	87.21
	Forest	NLCD 2011 "total forests", sum of NLCD 41, 42, and 43 categories, percent of upstream catchment		58.0076	60.58	0	100		55.5804	60.47	0	100.01		60.9307	65.24	0	100.01
